# Supplementary material for: Evaluation of automated molecular tests for detection of SARS-CoV-2 in pooled nasopharyngeal and saliva specimens
Source: Research Square preprint supplement (doi:10.21203/rs.3.rs-38634/v2), 2021-01-07
Supplement: Supplementary file 1 [file ff2e3021167f061594011d89.docx]

S1 Table 1. RT-qPCR CT values of pools with multiple positive specimens against individual test results

| Test Platform | Pool ID | Sample ID | Pool CT | Standard CT |
| --- | --- | --- | --- | --- |
| QIAstat | Q1 | S1 | 19.9 | Negative |
| S2 | Negative |
| S3 | Negative |
| S4 | Negative |
| S5 | 18.9 |
| S6 | Negative |
| S7 | Negative |
| S8 | Negative |
| S9 | 36 |
| S10 | Negative |
| Q2 | S1 | 30.7 | 33.4 |
| S2 | Negative |
| S3 | Negative |
| S4 | Negative |
| S5 | Negative |
| S6 | 29.5 |
| S7 | Negative |
| S8 | Negative |
| S9 | Negative |
| S10 | Negative |
| Q3 | S1 | 28.5 | 24.4 |
| S2 | Negative |
| S3 | Negative |
| S4 | Negative |
| S5 | Negative |
| S6 | 35.2 |
| S7 | Negative |
| S8 | Negative |
| S9 | 31.5 |
| S10 | Negative |
| Q4 | S1 | 24.3 | Negative |
| S2 | Negative |
| S3 | Negative |
| S4 | Negative |
| S5 | Negative |
| S6 | 19 |
| S7 | Negative |
| S8 | Negative |
| S9 | 30 |
| S10 | 24.2 |
| Q5 | S1 | Negative | 37 |
| S2 | 32.6 |
| S3 | Negative |
| S4 | Negative |
| S5 | Negative |
| S6 | Negative |
| S7 | Negative |
| S8 | Negative |
| S9 | Negative |
| S10 | Negative |
| Q6 | S1 | Negative | 33.3 |
| S2 | 35.8 |
| S3 | Negative |
| S4 | Negative |
| S5 | Negative |
| S6 | Negative |
| S7 | Negative |
| S8 | Negative |
| S9 | Negative |
| S10 | Negative |
| Xpert | X1 | S1 | 14 | Negative |
| S2 | Negative |
| S3 | Negative |
| S4 | 38.2 |
| S5 | 12.3 |
| X2 | S1 | 35.3 | Negative |
| S2 | Negative |
| S3 | Negative |
| S4 | 38 |
| S5 | 34.4 |
| X3 | S1 | 38.7 | Negative |
| S2 | Negative |
| S3 | Negative |
| S4 | 35.8 |
| S5 | 37 |
| X4 | S1 | 31.8 | Negative |
| S2 | Negative |
| S3 | 37.6 |
| S4 | 29.8 |
| S5 | Negative |

S2 Table. Individual assessment of specimens that gave discrepant results by pooled testing

| Sample ID | Standard RT-qPCR | Xpert Xpress SARS-CoV-2 | QRSP |
| --- | --- | --- | --- |
| 1 | Positive (CT = 34) | Positive (CT = 33.5) | Negative |
| 2 | Positive (CT = 36.4) | Positive (CT = 35.8) | Negative |
| 3 | Positive (CT = 35) | Positive (CT = 35.8) | Negative |
| 4 | Positive (CT = 37.2) | Positive (CT = 38.0) | Negative |
| 5 | Positive (CT = 34.4) | Positive (CT = 33.3) | Negative |
| 6 | Positive (CT = 36.9) | Positive (CT = 37.2) | Negative |
| 7 | Positive (CT = 33.3) | Positive (CT = 34.2) | Negative |
| 8 | Positive (CT = 33.9) | Positive (CT = 32.6) | Negative |
